# Supplementary material for: Factors Influencing Healthcare Experience of Patients with Self-Declared Diabetes: A Cross-Sectional Population-Based Study in the Basque Country
Source: MDPI journal article supplement (doi:10.3390/healthcare9050509), 2021-04-28
Supplement: s1 [file s1]

## Supplementary Material

**Table S1:** Model 1–WLS results (detailed). Differences in healthcare experience among patients with self-declared diabetes. The effect of sociodemographic and economic characteristics.

| Variable                        | Category                  | Factor 1: IN-TER<br>Coef. (CI 95%) | Factor 2: NEW<br>Coef. (CI 95%) | Factor 3: SELF<br>Coef. (CI 95%) | OVERALL IEXPAC<br>Coef. (CI 95%) |
|---------------------------------|---------------------------|------------------------------------|---------------------------------|----------------------------------|----------------------------------|
| Gender                          | Men                       | -0.078<br>(-0.445,0.290)           | 0.231<br>(-0.115,0.576)         | -0.151<br>(-0.517,0.215)         | -0.020<br>(-0.315,0.274)         |
| Baseline: Women                 |                           |                                    |                                 |                                  |                                  |
| Age ranges                      | 45 to 64                  | 0.687<br>(-2.374,3.749)            | 1.714<br>(-0.367,3.796)         | 3.174**<br>(1.019,5.330)         | 1.872*<br>(-0.214,3.958)         |
| Baseline: 25-44                 | 64 to 75                  | 0.791<br>(-2.100,3.682)            | 1.114<br>(-0.730,2.959)         | 3.826***<br>(1.880,5.772)        | 1.983**<br>(0.067,3.899)         |
|                                 | 75 to 89                  | 0.424<br>(-2.467,3.315)            | 0.805<br>(-1.016,2.626)         | 3.305**<br>(1.221,5.389)         | 1.576<br>(-0.373,3.524)          |
|                                 | 90 or over                | -0.410<br>(-3.182,2.363)           | -0.131<br>(-1.774,1.513)        | 1.100<br>(-0.695,2.894)          | 0.215<br>(-1.599,2.029)          |
| Occupation                      | Managers II               | 2.141**<br>(0.493,3.789)           | 5.555***<br>(2.430,8.680)       | 5.597**<br>(1.436,9.758)         | 4.329**<br>(1.505,7.153)         |
| Baseline: Managers I            | Intermediate              | 0.200<br>(-1.038,1.438)            | -0.599<br>(-1.433,0.236)        | 0.103<br>(-1.396,1.603)          | -0.053<br>(-1.059,0.953)         |
|                                 | Semi-qualified            | -1.655<br>(-7.445,4.134)           | 5.356**<br>(1.012,9.701)        | -1.132<br>(-4.669,2.405)         | 0.447<br>(-4.029,4.924)          |
|                                 | Non-qualified             | 1.203**<br>(0.256,2.151)           | 0.972**<br>(0.082,1.861)        | 2.784***<br>(1.807,3.762)        | 1.715***<br>(1.208,2.222)        |
| Education                       | Secondary-lower           | -3.149<br>(-8.881,2.582)           | 2.461<br>(-3.248,8.171)         | -2.252<br>(-6.394,1.889)         | -1.293<br>(-6.004,3.418)         |
| Baseline: Primary               | Secondary-upper           | -1.962<br>(-6.092,2.167)           | -2.410<br>(-5.327,0.506)        | -0.688<br>(-3.154,1.777)         | -1.621<br>(-4.751,1.508)         |
|                                 | Tertiary                  | -0.051<br>(-2.999,2.897)           | 0.981<br>(-2.336,4.298)         | 0.503<br>(-3.825,4.831)          | 0.432<br>(-2.859,3.723)          |
| Occupation # Age                | Managers II # 45 to 64    | -2.080**<br>(-4.096, -0.064)       | -5.068**<br>(-8.623, -1.512)    | -4.671**<br>(-8.972, -0.370)     | -3.837**<br>(-6.828, -0.847)     |
| Baseline: Managers I # 25 to 44 | Managers II # 64 to 75    | -2.664**<br>(-4.915, -0.413)       | -5.119**<br>(-8.744, -1.493)    | -5.754**<br>(-10.170, -1.338)    | -4.457**<br>(-7.580, -1.334)     |
|                                 | Managers II # 75-89       | -0.372<br>(-2.426,1.681)           | -5.358**<br>(-9.341, -1.375)    | -3.119<br>(-7.435,1.198)         | -2.731*<br>(-5.739,0.278)        |
|                                 | Managers II # >=90        | 0.359<br>(-1.289,2.007)            | -5.555***<br>(-8.680, -2.430)   | -0.597<br>(-4.758,3.564)         | -1.601<br>(-4.425,1.222)         |
|                                 | Intermediate # 45 to 64   | -1.755<br>(-4.749,1.239)           | 0.889<br>(-1.603,3.381)         | -0.704<br>(-2.797,1.389)         | -0.651<br>(-2.855,1.552)         |
|                                 | Intermediate # 64 to 75   | -1.324<br>(-3.220,0.572)           | 0.528<br>(-0.881,1.937)         | -0.857<br>(-2.829,1.115)         | -0.649<br>(-2.123,0.825)         |
|                                 | Semi-qualified # 45 to 64 | 1.631<br>(-4.247,7.510)            | -5.307**<br>(-9.851, -0.764)    | 1.813<br>(-1.891,5.517)          | -0.195<br>(-4.757,4.367)         |
|                                 | Semi-qualified # 64 to 75 | 1.266<br>(-4.590,7.122)            | -4.981**<br>(-9.436, -0.525)    | 1.162<br>(-2.491,4.815)          | -0.475<br>(-5.014,4.063)         |
|                                 | Semi-qualified # 75 to 89 | 2.049<br>(-3.804,7.902)            | -5.151**<br>(-9.589, -0.713)    | 1.382<br>(-2.354,5.118)          | -0.157<br>(-4.705,4.390)         |
|                                 | Semi-qualified # >=90     | 1.577<br>(-5.692,8.847)            | -4.501**<br>(-8.980, -0.021)    | 3.012<br>(-2.447,8.471)          | 0.441<br>(-5.080,5.963)          |

|                                 |           |                                 |                              |                            |                               |                               |
|---------------------------------|-----------|---------------------------------|------------------------------|----------------------------|-------------------------------|-------------------------------|
|                                 |           | Non-qualified #<br>45 to 64     | -2.000**<br>(-3.417, -0.583) | -1.179*<br>(-2.555, 0.196) | -3.021***<br>(-4.446, -1.596) | -2.147***<br>(-3.139, -1.156) |
|                                 |           | Non-qualified #<br>64 to 75     | -1.705**<br>(-2.914, -0.496) | -0.920<br>(-2.152, 0.312)  | -3.305***<br>(-4.539, -2.072) | -2.073***<br>(-2.869, -1.277) |
|                                 |           | Non-qualified #<br>75 to 89     | -1.295**<br>(-2.566, -0.023) | -0.772<br>(-1.983, 0.439)  | -2.893***<br>(-4.372, -1.413) | -1.733***<br>(-2.644, -0.823) |
|                                 |           | Secondary lower<br># 45 to 64   | 2.431<br>(-3.415, 8.278)     | -3.087<br>(-8.894, 2.719)  | 1.741<br>(-2.536, 6.019)      | 0.675<br>(-4.119, 5.470)      |
| Baseline:<br>Primary # 25 to 44 |           | Secondary lower<br># 64 to 75   | 2.935<br>(-2.832, 8.703)     | -2.913<br>(-8.651, 2.825)  | 1.913<br>(-2.278, 6.105)      | 0.969<br>(-3.772, 5.709)      |
|                                 |           | Secondary lower<br># 75 to 89   | 3.093<br>(-2.668, 8.854)     | -2.716<br>(-8.450, 3.018)  | 2.130<br>(-2.058, 6.318)      | 1.159<br>(-3.576, 5.893)      |
|                                 |           | Secondary lower<br># >=90       | 3.118<br>(-2.752, 8.989)     | -3.203<br>(-8.976, 2.571)  | 1.192<br>(-3.422, 5.806)      | 0.694<br>(-4.142, 5.530)      |
|                                 |           | Secondary up-<br>per # 45 to 64 | 1.536<br>(-2.758, 5.830)     | 2.071<br>(-1.002, 5.143)   | 0.509<br>(-2.174, 3.193)      | 1.308<br>(-1.942, 4.558)      |
|                                 |           | Secondary up-<br>per # 64 to 75 | 1.973<br>(-2.213, 6.160)     | 2.641*<br>(-0.372, 5.654)  | 0.435<br>(-2.137, 3.007)      | 1.596<br>(-1.588, 4.780)      |
|                                 |           | Secondary up-<br>per # 75 to 89 | 2.101<br>(-2.089, 6.290)     | 3.248**<br>(0.122, 6.373)  | 1.038<br>(-1.638, 3.715)      | 2.027<br>(-1.197, 5.252)      |
|                                 |           | Secondary up-<br>per # >=90     | 0.010<br>(-4.140, 4.159)     | 3.474**<br>(0.523, 6.425)  | -1.963<br>(-4.458, 0.533)     | 0.237<br>(-2.916, 3.391)      |
|                                 |           | Tertiary # 45 to<br>64          | 0.178<br>(-3.028, 3.384)     | -0.712<br>(-4.356, 2.931)  | -0.660<br>(-5.110, 3.790)     | -0.370<br>(-3.800, 3.060)     |
|                                 |           | Tertiary # 64 to<br>75          | -0.744<br>(-4.219, 2.732)    | -0.136<br>(-3.860, 3.588)  | -1.656<br>(-6.348, 3.037)     | -0.909<br>(-4.506, 2.687)     |
|                                 |           | Tertiary # 75 to<br>89          | -1.058<br>(-4.514, 2.398)    | -0.099<br>(-4.055, 3.856)  | -1.134<br>(-5.910, 3.642)     | -0.824<br>(-4.477, 2.829)     |
|                                 |           | Constant                        | 7.988***<br>(5.183, 10.792)  | -0.100<br>(-1.772, 1.572)  | 4.051***<br>(2.234, 5.869)    | 4.351***<br>(2.523, 6.178)    |
| Goodness-of-fit                 | R-squared |                                 | 0.067                        | 0.092                      | 0.074                         | 0.058                         |
|                                 | BIC       |                                 | 2536.062                     | 2453.380                   | 2550.006                      | 2307.144                      |
| Sample size (¥)                 |           |                                 | 554.000                      | 554.000                    | 554.000                       | 554.000                       |

\*  $p < 0.1$ , \*\*  $p < 0.05$ , \*\*\*  $p < 0.001$ ; BIC: Bayesian Information Criterion; The presented model is corrected from heteroscedasticity using Eicker–Huber–White standard errors. ¥: There is one missing response for occupation, and has been excluded for the analysis.

**Table S2:** Model 2–WLS results (detailed). Differences in healthcare experience among patients with self-declared diabetes. The chronic conditions' model.

| Variable                              | Category                   | Factor 1:<br>INTER<br>Coef. (CI 95%) | Factor 2:<br>NEW<br>Coef. (CI 95%) | Factor 3:<br>SELF<br>Coef. (CI 95%) | OVERALL<br>IEXPAC<br>Coef. (CI 95%) |
|---------------------------------------|----------------------------|--------------------------------------|------------------------------------|-------------------------------------|-------------------------------------|
| Gender<br>Baseline: Women             | Hombre                     | -0.189<br>(-0.602,0.225)             | 0.095<br>(-0.286,0.475)            | -0.263<br>(-0.665,0.138)            | -0.139<br>(-0.465,0.187)            |
| Age ranges<br>Baseline: 25-44         | 45 to 64                   | 0.290<br>(-3.651,4.232)              | 2.262*<br>(-0.374,4.899)           | 3.737**<br>(0.697,6.777)            | 2.082<br>(-0.616,4.779)             |
|                                       | 64 to 75                   | 0.325<br>(-3.319,3.969)              | 1.557<br>(-0.885,3.998)            | 4.356**<br>(1.543,7.169)            | 2.127*<br>(-0.376,4.630)            |
|                                       | 75 to 89                   | 0.184<br>(-3.628,3.996)              | 1.632<br>(-0.873,4.136)            | 4.103**<br>(1.146,7.059)            | 2.004<br>(-0.626,4.634)             |
|                                       | >=90                       | -0.164<br>-3.097,2.769               | 0.172<br>-1.392,1.736              | 1.296<br>-0.476,3.067               | 0.459<br>-1.356,2.273               |
| Occupation<br>Baseline:<br>Managers I | Managers II                | 1.188<br>(-1.703,4.079)              | 5.956**<br>(2.478,9.433)           | 5.081**<br>(0.903,9.259)            | 3.904**<br>(0.944,6.864)            |
|                                       | Intermediate               | -0.088<br>(-1.632,1.455)             | -0.633<br>(-1.635,0.369)           | -0.354<br>(-2.097,1.390)            | -0.333<br>(-1.588,0.921)            |
|                                       | Semi-qualified             | -2.270<br>(-9.272,4.733)             | 6.264**<br>(1.701,10.828)          | -0.317<br>(-4.728,4.094)            | 0.768<br>(-4.318,5.854)             |
|                                       | Non-qualified              | 0.709<br>(-1.683,3.101)              | 1.290<br>(-0.726,3.306)            | 3.229**<br>(0.941,5.516)            | 1.784**<br>(0.033,3.535)            |
|                                       | Secondary-lower            | -2.825<br>(-7.989,2.339)             | 2.892<br>(-3.106,8.890)            | -1.803<br>(-5.037,1.431)            | -0.894<br>(-5.058,3.269)            |
|                                       | Secondary-upper            | -2.040<br>(-6.301,2.221)             | -2.003<br>(-4.478,0.472)           | -0.718<br>(-3.160,1.724)            | -1.549<br>(-4.551,1.453)            |
|                                       | Tertiary                   | 0.576<br>(-2.434,3.586)              | 1.353<br>(-1.538,4.245)            | 1.203<br>(-2.567,4.973)             | 1.016<br>(-1.855,3.888)             |
|                                       | Managers II # 45 to 64     | -1.264<br>(-4.515,1.986)             | -5.561**<br>(-9.473,-1.649)        | -4.193*<br>(-8.598,0.212)           | -3.501**<br>(-6.700,-0.302)         |
|                                       | Managers II # 64 to 75     | -1.534<br>(-4.702,1.635)             | -5.592**<br>(-9.614,-1.571)        | -5.174**<br>(-9.561,-0.787)         | -3.964**<br>(-7.183,-0.746)         |
|                                       | Managers II # 75 to 89     | 0.649<br>(-2.760,4.059)              | -6.117**<br>(-10.557,-1.677)       | -2.681<br>(-7.303,1.941)            | -2.407<br>(-5.757,0.943)            |
|                                       | Managers II # >=90         | 1.187<br>(-1.013,3.386)              | -5.138**<br>(-8.222,-2.055)        | 0.667<br>(-3.107,4.441)             | -0.727<br>(-3.329,1.875)            |
|                                       | Intermediate # 45 to 64    | -1.591<br>(-5.094,1.912)             | 0.838<br>(-2.113,3.789)            | -0.356<br>(-2.813,2.101)            | -0.480<br>(-3.091,2.132)            |
|                                       | Intermediate # 64 to 75    | -1.057<br>(-3.290,1.176)             | 0.576<br>(-1.048,2.201)            | -0.523<br>(-2.777,1.730)            | -0.418<br>(-2.165,1.330)            |
|                                       | Semi-qualified # 45 to 64  | 2.162<br>(-4.922,9.246)              | -6.217**<br>(-11.000, -1.434)      | 0.969<br>(-3.568,5.506)             | -0.557<br>(-5.714,4.600)            |
|                                       | Semi-qualified # 64 to 75  | 1.853<br>(-5.180,8.886)              | -5.869**<br>(-10.546, -1.192)      | 0.199<br>(-4.339,4.737)             | -0.854<br>(-5.998,4.290)            |
|                                       | Semi-qualified # 75 to 89  | 2.381<br>(-4.715,9.477)              | -6.353**<br>(-11.017, -1.689)      | 0.222<br>(-4.407,4.850)             | -0.786<br>(-5.976,4.404)            |
|                                       | Semi-qualified # >=90      | 0.831<br>(-7.210,8.872)              | -5.374**<br>(-9.736, -1.012)       | 2.160<br>(-3.897,8.217)             | -0.378<br>(-6.265,5.509)            |
|                                       | Non-qualified # 45 to 64   | -1.568<br>(-4.301,1.166)             | -1.449<br>(-3.773,0.874)           | -3.549**<br>(-6.194, -0.905)        | -2.256**<br>(-4.288, -0.224)        |
|                                       | Non-qualified # 64 to 75   | -1.238<br>(-3.638,1.162)             | -1.146<br>(-3.331,1.040)           | -3.851**<br>(-6.229, -1.472)        | -2.163**<br>(-3.971, -0.355)        |
|                                       | Non-qualified # 75-89      | -0.969<br>(-3.616,1.679)             | -1.303<br>(-3.551,0.946)           | -3.628**<br>(-6.185, -1.072)        | -2.027**<br>(-4.021, -0.033)        |
| Education#Age<br>Baseline:            | Secondary-lower # 45 to 64 | 2.253<br>(-3.080,7.586)              | -3.415<br>(-9.547,2.717)           | 1.249<br>(-2.224,4.722)             | 0.342<br>(-3.949,4.633)             |

Primary\*25 to 44

|                            |                          |                           |                          |                          |
|----------------------------|--------------------------|---------------------------|--------------------------|--------------------------|
| Secondary-lower # 64 to 75 | 2.687<br>(-2.543,7.917)  | -2.757<br>(-8.790,3.276)  | 1.798<br>(-1.520,5.116)  | 0.879<br>(-3.334,5.092)  |
| Secondary-lower # 75 to 89 | 3.088<br>(-2.134,8.310)  | -2.708<br>(-8.730,3.315)  | 2.236<br>(-1.070,5.541)  | 1.197<br>(-3.002,5.397)  |
| Secondary-lower # >=90     | 2.245<br>(-3.071,7.561)  | -4.001<br>(-10.167,2.165) | 0.542<br>(-3.376,4.460)  | -0.078<br>(-4.389,4.234) |
| Secondary-upper # 45 to 64 | 1.755<br>(-2.708,6.218)  | 1.784<br>(-0.831,4.399)   | 0.587<br>(-2.142,3.316)  | 1.338<br>(-1.822,4.498)  |
| Secondary-upper # 64 to 75 | 2.107<br>(-2.223,6.436)  | 2.335*<br>(-0.278,4.948)  | 0.537<br>(-2.025,3.099)  | 1.598<br>(-1.473,4.669)  |
| Secondary-upper # 75 to 89 | 2.402<br>(-1.942,6.746)  | 3.022**<br>(0.325,5.718)  | 1.419<br>(-1.226,4.065)  | 2.214<br>(-0.901,5.328)  |
| Secondary-upper # >=90     | -0.159<br>(-5.040,4.723) | 2.057<br>(-1.207,5.321)   | -2.577<br>(-6.120,0.965) | -0.434<br>(-4.002,3.134) |
| Tertiary # 45 to 64        | -0.397<br>(-3.738,2.944) | -0.998<br>(-4.334,2.338)  | -1.334<br>(-5.303,2.635) | -0.902<br>(-3.987,2.184) |
| Tertiary # 64 to 75        | -1.325<br>(-4.808,2.158) | -0.278<br>(-3.749,3.193)  | -2.327<br>(-6.488,1.833) | -1.404<br>(-4.622,1.814) |
| Tertiary # 75 to 89        | -1.736<br>(-5.246,1.774) | -0.378<br>(-4.006,3.251)  | -1.868<br>(-6.215,2.478) | -1.414<br>(-4.741,1.914) |
| Caries                     | 0.500<br>(-0.484,1.484)  | 0.098<br>(-0.756,0.953)   | 0.576<br>(-0.350,1.503)  | 0.418<br>(-0.325,1.161)  |
| Other, mouth               | -0.040<br>(-0.834,0.754) | 0.088<br>(-0.617,0.793)   | -0.113<br>(-1.128,0.903) | -0.032<br>(-0.688,0.625) |
| Hypertension               | 0.067<br>(-0.317,0.451)  | 0.162<br>(-0.185,0.510)   | -0.069<br>(-0.457,0.320) | 0.044<br>(-0.266,0.353)  |
| Cholesterol (high)         | -0.038<br>(-0.427,0.351) | -0.079<br>(-0.458,0.301)  | -0.197<br>(-0.577,0.183) | -0.107<br>(-0.423,0.209) |
| Fibromyalgia               | 0.477<br>(-1.680,2.634)  | 1.190*<br>(-0.063,2.443)  | 0.312<br>(-1.290,1.915)  | 0.611<br>(-0.759,1.982)  |
| Rheumatism                 | 0.213<br>(-0.450,0.876)  | -0.297<br>(-0.769,0.174)  | 0.359<br>(-0.277,0.996)  | 0.127<br>(-0.380,0.634)  |
| Upper-back pain            | 0.060<br>(-0.611,0.732)  | -0.477<br>(-1.048,0.095)  | -0.201<br>(-0.920,0.518) | -0.181<br>(-0.719,0.357) |
| Lower-back pain            | -0.008<br>(-0.765,0.748) | -0.397<br>(-0.900,0.106)  | -0.013<br>(-0.717,0.691) | -0.116<br>(-0.671,0.439) |
| Asthma                     | -0.121<br>(-1.071,0.828) | -0.177<br>(-1.032,0.679)  | 0.209<br>(-0.553,0.971)  | -0.016<br>(-0.720,0.687) |
| Varicose veins (in legs)   | 0.239<br>(-0.341,0.819)  | 0.091<br>(-0.473,0.655)   | 0.024<br>(-0.606,0.654)  | 0.121<br>(-0.350,0.591)  |
| Thrombosis                 | -0.127<br>(-1.307,1.052) | 0.029<br>(-1.105,1.163)   | -0.252<br>(-1.395,0.891) | -0.130<br>(-1.074,0.814) |
| AMI                        | -0.252<br>(-1.314,0.810) | -0.273<br>(-1.121,0.575)  | -0.084<br>(-1.253,1.085) | -0.197<br>(-0.965,0.572) |
| Other, heart               | 0.112<br>(-0.395,0.619)  | 0.188<br>(-0.288,0.664)   | 0.261<br>(-0.273,0.795)  | 0.187<br>(-0.229,0.603)  |
| Allergy                    | -0.608<br>(-2.668,1.451) | -0.524<br>(-1.393,0.346)  | -0.572<br>(-2.156,1.011) | -0.572<br>(-1.968,0.824) |
| COPD                       | -0.432<br>(-1.603,0.740) | -0.512<br>(-1.424,0.400)  | -0.049<br>(-0.959,0.862) | -0.314<br>(-1.179,0.550) |
| Stomach ulcer              | -0.468<br>(-2.027,1.091) | -0.373<br>(-1.953,1.208)  | -1.035<br>(-2.547,0.478) | -0.648<br>(-2.003,0.706) |
| Hemorrhoids                | -0.311<br>(-1.346,0.724) | 0.107<br>(-0.751,0.964)   | -0.255<br>(-1.310,0.800) | -0.177<br>(-0.893,0.540) |
| Cancer                     | -0.233<br>(-1.294,0.828) | 0.193<br>(-0.657,1.044)   | 0.035<br>(-0.981,1.050)  | -0.019<br>(-0.871,0.832) |
| Blindness                  | -0.997                   | 0.023                     | -0.306                   | -0.468                   |

Chronic conditions

|                 |                   |                              |                             |                              |                              |
|-----------------|-------------------|------------------------------|-----------------------------|------------------------------|------------------------------|
|                 |                   | (-2.484,0.489)               | (-0.762,0.808)              | (-1.727,1.116)               | (-1.567,0.632)               |
|                 | Cataracts         | -0.144<br>(-0.857,0.569)     | 0.053<br>(-0.665,0.770)     | -0.191<br>(-1.031,0.649)     | -0.108<br>(-0.720,0.505)     |
|                 | Deafness          | -0.195<br>(-0.948,0.557)     | -0.212<br>(-0.709,0.285)    | 0.007<br>(-0.791,0.805)      | -0.127<br>(-0.701,0.448)     |
|                 | Skin              | -0.195<br>(-1.526,1.137)     | 0.150<br>(-0.743,1.043)     | 0.283<br>(-0.850,1.417)      | 0.073<br>(-0.924,1.070)      |
|                 | Thyroids          | -0.126<br>(-0.767,0.514)     | 0.270<br>(-0.318,0.859)     | 0.127<br>(-0.531,0.785)      | 0.074<br>(-0.440,0.588)      |
|                 | Prostatitis       | 0.148<br>(-0.545,0.841)      | -0.440<br>(-1.117,0.238)    | -0.177<br>(-1.042,0.688)     | -0.130<br>(-0.765,0.504)     |
|                 | Incontinence      | 0.032<br>(-0.834,0.899)      | -0.337<br>(-1.054,0.380)    | -0.351<br>(-1.333,0.630)     | -0.208<br>(-0.880,0.464)     |
|                 | Dementia          | 0.908<br>(-0.244,2.060)      | 0.642<br>(-0.223,1.507)     | 0.405<br>(-1.047,1.856)      | 0.652<br>(-0.328,1.633)      |
|                 | Anxiety           | 0.256<br>(-0.619,1.131)      | 0.670<br>(-0.383,1.724)     | -0.045<br>(-1.099,1.008)     | 0.259<br>(-0.548,1.067)      |
|                 | Depression        | 0.175<br>(-0.653,1.003)      | -0.454<br>(-1.085,0.176)    | 0.480<br>(-0.439,1.400)      | 0.115<br>(-0.493,0.722)      |
|                 | Other, mental     | -0.862<br>(-2.109,0.385)     | -0.919**<br>(-1.734,-0.105) | -0.443<br>(-2.257,1.371)     | -0.725<br>(-1.779,0.328)     |
|                 | Migraine          | -0.747<br>(-2.074,0.579)     | -0.485<br>(-1.113,0.143)    | -1.164<br>(-2.738,0.411)     | -0.827<br>(-1.894,0.240)     |
|                 | Osteoporosis      | -0.124<br>(-1.026,0.778)     | -0.447<br>(-1.047,0.154)    | -0.731<br>(-1.717,0.256)     | -0.433<br>(-1.112,0.246)     |
|                 | Anemia            | 0.873*<br>(0.088,1.658)      | -0.144<br>(-0.954,0.667)    | 0.418<br>(-0.482,1.319)      | 0.430<br>(-0.231,1.091)      |
|                 | Constipation      | -1.161**<br>(-2.157, -0.165) | -0.142<br>(-0.957,0.674)    | -1.423**<br>(-2.443, -0.402) | -0.978**<br>(-1.707, -0.250) |
|                 | Diabetic foot     | -0.326<br>(-1.771,1.119)     | 1.163<br>(-0.285,2.612)     | 0.181<br>(-1.661,2.023)      | 0.265<br>(-1.057,1.586)      |
|                 | Blood circulation | -0.134<br>(-0.873,0.604)     | -0.003<br>(-0.486,0.481)    | 0.005<br>(-0.673,0.682)      | -0.048<br>(-0.589,0.493)     |
|                 | Insomnia          | -0.594<br>(-1.501,0.312)     | -0.170<br>(-0.684,0.343)    | -0.329<br>(-1.122,0.465)     | -0.382<br>(-1.019,0.255)     |
|                 | Kidney            | -0.743<br>(-1.736,0.250)     | -0.148<br>(-0.813,0.517)    | -0.713<br>(-1.654,0.228)     | -0.570<br>(-1.312,0.172)     |
|                 | Other chronic     | 0.567<br>(-0.309,1.442)      | -0.120<br>(-0.857,0.616)    | 0.467<br>(-0.354,1.289)      | 0.343<br>(-0.290,0.976)      |
|                 | Constant          | 8.546***<br>(4.906,12.186)   | -0.560<br>(-2.909,1.788)    | 3.770**<br>(1.055,6.485)     | 4.326***<br>(1.865,6.786)    |
| Goodness of fit | R-squared         | 0.124                        | 0.147                       | 0.140                        | 0.123                        |
|                 | BIC               | 2740.861                     | 2664.738                    | 2749.151                     | 2507.772                     |
| Sample size (¥) | N                 | 554                          | 554                         | 554                          | 554                          |

¥: Acute Myocardial Infarction; COPD: Chronic Obstructive Pulmonary Disorder; \* p < 0.1, \*\* p < 0.05, \*\*\* p < 0.001; BIC: Bayesian Information Criterion; The presented model is corrected from heteroscedasticity using Eicker–Huber–White standard errors. ¥: There is one missing response for occupation, and has been excluded for the analysis.

**Table S3.** Model 3–WLS results (detailed). Differences in healthcare experience among patients with diabetes. The effect of the presence of multi-morbidity.

| Variable | Category | Factor 1:<br>INTER<br>Coef. (C.I. 95%) | Factor 2:<br>NEW<br>Coef. (C.I. 95%) | Factor 3:<br>SELF<br>Coef. (C.I. 95%) | OVERALL<br>IEXPAC<br>Coef. (C.I. 95%) |
|----------|----------|----------------------------------------|--------------------------------------|---------------------------------------|---------------------------------------|
|----------|----------|----------------------------------------|--------------------------------------|---------------------------------------|---------------------------------------|

|                                    |                           |                                 |                                 |                                  |                                 |
|------------------------------------|---------------------------|---------------------------------|---------------------------------|----------------------------------|---------------------------------|
| Gender                             | Men                       | -0.158                          | 0.141                           | -0.223                           | -0.100                          |
| Baseline: Women                    |                           | (-0.536,0.220)                  | (-0.214,0.496)                  | (-0.602,0.157)                   | (-0.405,0.204)                  |
| Age ranges<br>Baseline: 25 to 44   | 45 to 64                  | -7.575***<br>(-11.329, -3.822)  | -8.357***<br>(-12.602, -4.111)  | -6.026***<br>(-9.594, -2.458)    | -7.225***<br>(-10.291, -4.158)  |
|                                    | 64 to 75                  | -7.894***<br>(-11.396, -4.393)  | -8.669***<br>(-12.849, -4.489)  | -5.607**<br>(-8.991, -2.222)     | -7.274***<br>(-10.196, -4.352)  |
|                                    | 75 to 89                  | -8.445***<br>(-12.154, -4.735)  | -9.081***<br>(-13.239, -4.922)  | -6.145**<br>(-9.810, -2.481)     | -7.782***<br>(-10.832, -4.732)  |
|                                    | >=90                      | 0.255<br>(-2.952,3.461)         | -3.717***<br>(-5.791, -1.644)   | -1.244<br>(-4.388,1.901)         | -1.374<br>(-3.784,1.037)        |
|                                    |                           |                                 |                                 |                                  |                                 |
| Education<br>Baseline: Primary     | Secondary-lower           | -10.690***<br>(-11.626, -9.753) | -5.331**<br>(-8.586, -2.076)    | -11.017***<br>(-11.675, -10.359) | -9.347***<br>(-10.707, -7.988)  |
|                                    | Secondary-upper           | -10.876***<br>(-11.753, -9.999) | -11.054***<br>(-14.305, -7.803) | -10.678***<br>(-11.244, -10.112) | -10.853***<br>(-12.190, -9.515) |
|                                    | Tertiary                  | -0.266<br>(-0.832,0.300)        | -0.653<br>(-2.529,1.223)        | -0.710**<br>(-0.981, -0.439)     | -0.533<br>(-1.326,0.261)        |
| Occupation<br>Baseline: Managers I | Managers II               | 5.632**<br>(1.112,10.152)       | 8.280***<br>(6.207,10.354)      | 8.836***<br>(5.399,12.273)       | 7.519***<br>(4.589,10.449)      |
|                                    | Intermediate              | 0.174<br>(-1.072,1.420)         | -0.754<br>(-1.625,0.118)        | -0.004<br>(-1.467,1.459)         | -0.143<br>(-1.131,0.844)        |
|                                    | Semi-qualified            | 4.364**<br>(1.099,7.628)        | 8.130***<br>(4.777,11.483)      | 4.296**<br>(1.125,7.468)         | 5.366***<br>(2.737,7.996)       |
|                                    | Non-qualified             | 3.020*<br>(-0.133,6.174)        | 1.102**<br>(0.220,1.984)        | 4.466**<br>(1.335,7.597)         | 3.023**<br>(0.747,5.298)        |
| Occupation #<br>Age                | Managers II # 45 to 64    | -5.712**<br>(-10.380, -1.045)   | -7.653***<br>(-10.380, -4.926)  | -7.940***<br>(-11.559, -4.321)   | -7.051***<br>(-10.150, -3.953)  |
|                                    | Managers II # 64 to 75    | -6.272**<br>(-11.070, -1.474)   | -7.620***<br>(-10.399, -4.841)  | -8.962***<br>(-12.720, -5.204)   | -7.618***<br>(-10.854, -4.382)  |
|                                    | Managers II # 75 to 89    | -3.975*<br>(-8.658,0.708)       | -8.422***<br>(-11.973, -4.871)  | -6.602***<br>(-10.316, -2.887)   | -6.143***<br>(-9.323, -2.962)   |
|                                    | Managers II # >=90        | -3.132<br>(-7.652,1.388)        | -8.280***<br>(-10.354, -6.207)  | -3.836**<br>(-7.273, -0.399)     | -4.792**<br>(-7.722, -1.862)    |
|                                    | Intermediate # 45 to 64   | -1.804<br>(-4.982,1.373)        | 1.125<br>(-1.254,3.505)         | -0.594<br>(-2.729,1.540)         | -0.565<br>(-2.820,1.689)        |
|                                    | Intermediate # 64 to 75   | -1.354<br>(-3.307,0.600)        | 0.771<br>(-0.582,2.124)         | -0.731<br>(-2.713,1.251)         | -0.548<br>(-2.034,0.939)        |
|                                    | Semi-qualified # 45 to 64 | -4.364**<br>(-7.785, -0.943)    | -8.101***<br>(-11.709, -4.494)  | -3.612**<br>(-6.975, -0.250)     | -5.110***<br>(-7.890, -2.329)   |
|                                    | Semi-qualified # 64 to 75 | -4.739**<br>(-8.130, -1.347)    | -7.661***<br>(-11.159, -4.163)  | -4.224**<br>(-7.532, -0.916)     | -5.348***<br>(-8.088, -2.609)   |
|                                    | Semi-qualified# 75 to 89  | -3.990**<br>(-7.371, -0.608)    | -7.944***<br>(-11.412, -4.477)  | -4.084**<br>(-7.472, -0.695)     | -5.102***<br>(-7.849, -2.356)   |
|                                    | Semi-qualified # >=90     | -3.660<br>(-8.047,0.728)        | -7.133***<br>(-10.566, -3.699)  | -1.678<br>(-5.886,2.530)         | -3.886**<br>(-7.239, -0.533)    |
|                                    | Non-qualified # 45 to 64  | -3.900**<br>(-7.238, -0.563)    | -1.251*<br>(-2.667,0.165)       | -4.736**<br>(-8.054, -1.418)     | -3.482**<br>(-5.932, -1.032)    |
|                                    | Non-qualified # 64 to 75  | -3.632**<br>(-6.893, -0.372)    | -0.845<br>(-2.076,0.386)        | -4.956**<br>(-8.185, -1.728)     | -3.354**<br>(-5.719, -0.989)    |
|                                    | Non-qualified # 75 to 89  | -3.159*<br>(-6.431,0.112)       | -0.999<br>(-2.195,0.198)        | -4.672**<br>(-7.992, -1.353)     | -3.120<br>(-5.517, -0.724)      |

|                                         |                               |                                  |                                 |                                  |                                 |
|-----------------------------------------|-------------------------------|----------------------------------|---------------------------------|----------------------------------|---------------------------------|
| Educa-<br>tion#Age                      | Secondary-lower #<br>45 to 64 | 9.970***<br>(8.424,11.516)       | 4.788**<br>(1.339,8.238)        | 10.510***<br>(9.192,11.827)      | 8.753***<br>(7.094,10.412)      |
|                                         | Secondary-lower #<br>64 to 75 | 10.273***<br>(9.070,11.475)      | 5.202**<br>(1.900,8.504)        | 10.702***<br>(9.725,11.679)      | 9.046***<br>(7.565,10.527)      |
|                                         | Secondary-lower #<br>75 to 89 | 10.652***<br>(9.505,11.799)      | 5.301**<br>(1.992,8.610)        | 11.006***<br>(10.030,11.983)     | 9.321***<br>(7.855,10.787)      |
|                                         | Secondary-lower #<br>≥90      | 9.976***<br>(7.505,12.448)       | 3.904**<br>(0.524,7.284)        | 9.276***<br>(7.109,11.442)       | 8.065***<br>(6.057,10.074)      |
|                                         | Secondary-upper #<br>45 to 64 | 10.376<br>(8.763,11.989)         | 10.869<br>(7.460,14.279)        | 10.473<br>(9.165,11.781)         | 10.546<br>(8.881,12.211)        |
|                                         | Secondary-upper #<br>64-75    | 10.859***<br>(9.740,11.979)      | 11.368***<br>(8.015,14.721)     | 10.446***<br>(9.495,11.398)      | 10.848***<br>(9.371,12.325)     |
|                                         | Secondary-upper #<br>75-89    | 11.028***<br>(9.864,12.192)      | 11.965***<br>(8.523,15.407)     | 11.057***<br>(9.862,12.252)      | 11.294***<br>(9.732,12.857)     |
|                                         | Secondary-upper #<br>≥90      | 8.843***<br>(8.018,9.668)        | 12.028***<br>(8.794,15.262)     | 7.955***<br>(7.473,8.438)        | 9.389***<br>(8.075,10.703)      |
|                                         | Tertiary # 45 to 64           | 0.292<br>(-1.230,1.815)          | 1.086<br>(-1.344,3.516)         | 0.499<br>(-0.712,1.710)          | 0.584<br>(-0.756,1.924)         |
|                                         | Tertiary # 64 to 75           | -0.436<br>(-2.290,1.417)         | 1.623<br>(-0.918,4.164)         | -0.355<br>(-2.151,1.441)         | 0.155<br>(-1.458,1.768)         |
|                                         | Tertiary # 75 to 89           | -0.861<br>(-2.796,1.075)         | 1.474<br>(-1.413,4.361)         | 0.022<br>(-2.041,2.086)          | 0.097<br>(-1.707,1.901)         |
| Number of<br>conditions.<br>Baseline: 1 | 2                             | -12.073***<br>(-15.428, -8.717)  | -10.657***<br>(-14.591, -6.724) | -11.372***<br>(-12.930, -9.814)  | -11.432***<br>(-13.743, -9.121) |
|                                         | 3                             | -11.336***<br>(-12.431, -10.242) | -10.146***<br>(-15.395, -4.896) | -12.627***<br>(-13.313, -11.942) | -11.481***<br>(-13.539, -9.423) |
|                                         | +3                            | -9.461***<br>(-10.556, -8.367)   | -5.979**<br>(-11.229, -0.729)   | -7.002***<br>(-7.688, -6.317)    | -7.617***<br>(-9.675, -5.559)   |
|                                         |                               |                                  |                                 |                                  |                                 |
| Age#Number<br>of conditions             | 45 to 64 # 2                  | 11.715***<br>(8.174,15.257)      | 10.711***<br>(6.689,14.733)     | 11.281***<br>(9.353,13.209)      | 11.283***<br>(8.819,13.748)     |
|                                         | 45 to 64 # 3                  | 10.677***<br>(9.043,12.311)      | 10.804***<br>(5.429,16.179)     | 12.542***<br>(11.178,13.906)     | 11.390***<br>(9.125,13.654)     |
|                                         | 45 to 64 # +3                 | 8.794***<br>(7.176,10.412)       | 6.482**<br>(1.150,11.813)       | 6.753***<br>(5.390,8.116)        | 7.421***<br>(5.168,9.675)       |
|                                         | 64 to 75 # 2                  | 11.839***<br>(8.318,15.359)      | 11.390***<br>(7.304,15.475)     | 11.600***<br>(9.708,13.492)      | 11.629***<br>(9.135,14.124)     |
|                                         | 64 to 75 # 3                  | 11.015***<br>(9.572,12.459)      | 10.052***<br>(4.716,15.389)     | 12.499***<br>(11.315,13.683)     | 11.292***<br>(9.081,13.503)     |
|                                         | 64 to 75 # +3                 | 9.721***<br>(8.311,11.132)       | 5.471**<br>(0.146,10.796)       | 6.993***<br>(5.846,8.139)        | 7.570***<br>(5.372,9.768)       |
|                                         | 75 to 89 # 2                  | 12.397***<br>(8.715,16.079)      | 11.877***<br>(7.791,15.963)     | 12.207***<br>(10.021,14.392)     | 12.186***<br>(9.600,14.772)     |
|                                         | 75 to 89 # 3                  | 11.301***<br>(9.359,13.243)      | 10.455***<br>(5.137,15.773)     | 12.615***<br>(10.890,14.340)     | 11.548***<br>(9.174,13.922)     |
|                                         | 75 to 89 # +3                 | 9.480***<br>(7.635,11.324)       | 5.993**<br>(0.686,11.299)       | 6.955***<br>(5.349,8.562)        | 7.611***<br>(5.281,9.940)       |
|                                         | ≥90 # 2                       | -0.837<br>(-6.832,5.159)         | 3.752***<br>(1.687,5.818)       | 1.130<br>(-3.961,6.222)          | 1.130<br>(-2.902,5.163)         |
|                                         | ≥90 # 3                       | -0.555<br>(-2.881,1.770)         | 5.099***<br>(4.118,6.079)       | 3.481**<br>(1.372,5.590)         | 2.454**<br>(0.937,3.972)        |
|                                         |                               |                                  |                                 |                                  |                                 |
|                                         |                               |                                  |                                 |                                  |                                 |
|                                         |                               |                                  |                                 |                                  |                                 |
| Constant                                |                               | 16.865***<br>(13.512,20.217)     | 9.556***<br>(5.502,13.610)      | 13.469***<br>(10.230,16.707)     | 13.636***<br>(10.832,16.441)    |
| Goodness-of-<br>fit                     | R-squared                     | 0.128                            | 0.156                           | 0.120                            | 0.123                           |
|                                         | BIC                           | 2580.621                         | 2488.809                        | 2604.232                         | 2343.248                        |

|                                                |     |                 |                 |                 |                 |
|------------------------------------------------|-----|-----------------|-----------------|-----------------|-----------------|
| Heteroscedas-<br>ticity correc-<br>tion method | YES | Robust variance | Robust variance | Robust variance | Robust variance |
|                                                | N   | 554.000         | 554.000         | 554.000         | 554.000         |

\* p < 0.1, \*\* p < 0.05, \*\*\* p < 0.001; BIC: Bayesian Information Criterion; The presented model is corrected from heteroscedasticity using Eicker–Huber–White standard errors. ¥: There is one missing response for occupation, and has been excluded for the analysis.
